# Supplementary material for: Genotype-Phenotype Correlations in Neurofibromatosis Type 1: A Single-Center Cohort Study
Source: MDPI journal article supplement (doi:10.3390/cancers13081879), 2021-04-14
Supplement: s1 [file s1]

Supplementary

# Genotype-Phenotype Correlations in Neurofibromatosis Type 1: A Single-Center Cohort Study

Marcello Scala et. al

**Table S3.** Common neurological features† correlations.

|                       |               | No<br>(N = 214) | Yes<br>(N = 73) | Univariate | Multivariate |
|-----------------------|---------------|-----------------|-----------------|------------|--------------|
| Age classes           | 0–12 years    | 86 (40.2)       | 29 (39.7)       | 0.52       |              |
|                       | 13–18 years   | 115 (53.7)      | 42 (57.5)       |            |              |
|                       | 19–44 years   | 13 (6.1)        | 2 (2.7)         |            |              |
| Sex, males            |               | 106 (49.5)      | 36 (49.3)       | 0.97       |              |
| Family history        |               | 70 (32.7)       | 18 (24.7)       | 0.20*      | NS           |
| Status                | De novo       | 33 (15.4)       | 15 (20.5)       | 0.57       |              |
|                       | Maternal      | 21 (9.8)        | 8 (11.0)        |            |              |
|                       | Paternal      | 28 (13.1)       | 6 (8.2)         |            |              |
|                       | Not available | 132 (61.7)      | 44 (60.3)       |            |              |
| Duplication           |               | 1 (0.5)         | 1 (1.4)         | 0.42       |              |
| Partial deletions     |               | 5 (2.3)         | 3 (4.1)         | 0.43       |              |
| Whole gene deletions  |               | 7 (3.3)         | 3 (4.1)         | 0.74       |              |
| Splicing variants     |               | 29 (13.6)       | 7 (9.6)         | 0.38       |              |
| Missense variants     |               | 49 (22.9)       | 14 (19.2)       | 0.51       |              |
| Stop gain variants    |               | 66 (30.8)       | 19 (26.0)       | 0.44       |              |
| Frameshift variants   |               | 47 (22.0)       | 23 (31.5)       | 0.10*      | NS           |
| Intragenic deletions  |               | 9 (4.2)         | 1 (1.4)         | 0.25       |              |
| c.574C>T; p.(R192*)   |               | 6 (2.8)         | 1 (1.4)         | 0.49       |              |
| c.6855C>A; p.(Y2285*) |               | 6 (2.8)         | 1 (1.4)         | 0.49       |              |
| c.3721C>T; p.(R1241*) |               | 5 (2.3)         | 0 (0.0)         | 0.19*      | NS           |
| c.6772C>T; p.(R2258*) |               | 4 (1.9)         | 0 (0.0)         | 0.58       |              |
| c.910C>T; p.(R304*)   |               | 3 (1.4)         | 1 (1.4)         | 0.99       |              |
| c.2041C>T; p.(R681*)  |               | 3 (1.4)         | 0 (0.0)         | 0.57       |              |
| c.5488C>T; p.(R1830C) |               | 2 (0.9)         | 0 (0.0)         | 0.41       |              |

† Common neurological features include: headache, epilepsy, behavioral abnormalities, severe learning disabilities and DD/ID. \* =  $p$ -value  $\leq 0.20$ , therefore included in the multivariate analysis together with \*\* =  $p$ -value  $\leq 0.05$ .

Table S4. OPGs correlations.

| Column Title                  | Column Title  | No<br>(N = 197) | Yes<br>(N = 70) | Univariate | Multivariate |
|-------------------------------|---------------|-----------------|-----------------|------------|--------------|
| Age classes                   | 0–12 years    | 79 (40.1)       | 28 (40.0)       | 0.12*      | NS           |
|                               | 13–18 years   | 107 (54.3)      | 42 (60.0)       |            |              |
|                               | 19–44 years   | 11 (5.6)        | 0 (0.0)         |            |              |
| Sex, males                    |               | 102 (51.8)      | 31 (44.3)       | 0.28       |              |
| Family history (first degree) |               | 57 (28.9)       | 24 (34.3)       | 0.40       |              |
| Status                        | De novo       | 31 (15.7)       | 16 (22.9)       | 0.33       |              |
|                               | Maternal      | 21 (10.7)       | 7 (10.0)        |            |              |
|                               | Paternal      | 22 (11.2)       | 11 (15.7)       |            |              |
|                               | Not available | 123 (62.4)      | 36 (51.4)       |            |              |
| Duplication                   |               | 0 (0.0)         | 1 (1.4)         | 0.26       |              |
| Partial deletions             |               | 6 (3.0)         | 2 (2.9)         | 0.94       |              |
| Whole gene deletions          |               | 7 (3.6)         | 3 (4.3)         | 0.78       |              |
| Splicing variants             |               | 23 (11.7)       | 10 (14.3)       | 0.57       |              |
| Missense variants             |               | 49 (24.9)       | 10 (14.3)       | 0.07*      | NS           |
| Stop gain variants            |               | 52 (26.4)       | 25 (35.7)       | 0.14*      | NS           |
| Frameshift variants           |               | 52 (26.4)       | 15 (21.4)       | 0.41       |              |
| Intragenic deletions          |               | 5 (2.5)         | 4 (5.7)         | 0.21       |              |
| c.574C>T; p.(R192*)           |               | 6 (3.0)         | 0 (0.0)         | 0.35       |              |
| c.6855C>A; p.(Y2285*)         |               | 6 (3.0)         | 0 (0.0)         | 0.35       |              |
| c.3721C>T; p.(R1241*)         |               | 2 (1.0)         | 3 (4.3)         | 0.12*      | NS           |
| c.6772C>T; p.(R2258*)         |               | 3 (1.5)         | 1 (1.4)         | 0.99       |              |
| c.910C>T; p.(R304*)           |               | 1 (0.5)         | 2 (2.9)         | 0.17*      | NS           |
| c.2041C>T; p.(R681*)          |               | 3 (1.5)         | 0 (0.0)         | 0.57       |              |
| c.5488C>T; p.(R1830C)         |               | 2 (1.0)         | 0 (0.0)         | 0.99       |              |

OPGs = optic pathway gliomas. \* =  $p$ -value  $\leq 0.20$ , therefore included in the multivariate analysis together with \*\* =  $p$ -value  $\leq 0.05$ .

Table S5. Scoliosis correlations.

| Column Title                  | Column Title  | No<br>(N = 228) | Yes<br>(N = 59) | Univariate | Multivariate             |
|-------------------------------|---------------|-----------------|-----------------|------------|--------------------------|
| Age classes                   | 0–12 years    | 105 (46.1)      | 10 (16.9)       |            | Ref.                     |
|                               | 13–18 years   | 108 (47.4)      | 49 (83.1)       | <0.001**   | 4.76 (2.29–9.90); <0.001 |
|                               | 19–44 years   | 15 (6.6)        | 0 (0.0)         |            | NS                       |
| Sex, males                    |               | 118 (51.8)      | 24 (40.7)       | 0.13*      | NS                       |
| Family history (first degree) |               | 74 (32.5)       | 14 (23.7)       | 0.21       |                          |
| Status                        | De novo       | 38 (16.7)       | 10 (16.9)       |            |                          |
|                               | Maternal      | 23 (10.1)       | 6 (10.2)        |            |                          |
|                               | Paternal      | 27 (11.8)       | 7 (11.9)        | 0.99       |                          |
|                               | Not available | 140 (61.4)      | 36 (61.0)       |            |                          |
| Duplication                   |               | 1 (0.4)         | 1 (1.7)         | 0.37       |                          |
| Partial deletions             |               | 7 (3.1)         | 1 (1.7)         | 0.57       |                          |
| Whole gene deletions          |               | 6 (2.6)         | 4 (6.8)         | 0.12*      | NS                       |
| Splicing variants             |               | 27 (11.8)       | 9 (15.3)        | 0.48       |                          |
| Missense variants             |               | 50 (21.9)       | 13 (22.0)       | 0.99       |                          |
| Stop gain variants            |               | 68 (29.8)       | 17 (28.8)       | 0.88       |                          |
| Frameshift variants           |               | 59 (25.9)       | 11 (18.6)       | 0.25       |                          |
| Intragenic deletions          |               | 8 (3.5)         | 2 (3.4)         | 0.97       |                          |
| c.574C>T; p.(R192*)           |               | 5 (2.2)         | 2 (3.4)         | 0.60       |                          |
| c.6855C>A; p.(Y2285*)         |               | 6 (2.6)         | 1 (1.7)         | 0.68       |                          |
| c.3721C>T; p.(R1241*)         |               | 4 (1.8)         | 1 (1.7)         | 0.99       |                          |
| c.6772C>T; p.(R2258*)         |               | 4 (1.8)         | 0 (0.0)         | 0.59       |                          |
| c.910C>T; p.(R304*)           |               | 4 (1.8)         | 0 (0.0)         | 0.59       |                          |
| c.2041C>T; p.(R681*)          |               | 1 (0.4)         | 2 (3.4)         | 0.11*      | NS                       |
| c.5488C>T; p.(R1830C)         |               | 2 (0.9)         | 0 (0.0)         | 0.99       |                          |

\* =  $p$ -value  $\leq 0.20$ , therefore included in the multivariate analysis together with \*\* =  $p$ -value  $\leq 0.05$ .

Table S6. CALMs correlations.

| Column Title                  | Column Title  | No<br>(N = 12) | Yes<br>(N = 275) | Univariate | Multivariate              |
|-------------------------------|---------------|----------------|------------------|------------|---------------------------|
| Age classes                   | 0–12 years    | 3 (25.0)       | 112 (40.7)       |            | Ref.                      |
|                               | 13–18 years   | 9 (75.0)       | 148 (53.8)       | 0.32       |                           |
|                               | 19–44 years   | 0 (0.0)        | 15 (5.5)         |            |                           |
| Sex, males                    |               | 7 (58.3)       | 135 (49.1)       | 0.53       |                           |
| Family history (first degree) |               | 10 (83.3)      | 78 (28.4)        | <0.001**   | 0.06 (0.01 - 0.32); 0.001 |
| Status                        | De novo       | 1 (8.3)        | 47 (17.1)        |            |                           |
|                               | Maternal      | 4 (33.3)       | 25 (9.1)         |            |                           |
|                               | Paternal      | 4 (33.3)       | 30 (10.9)        | 0.002**    | NS                        |
|                               | Not available | 3 (25.0)       | 173 (62.9)       |            |                           |
| Duplication                   |               | 0 (0.0)        | 2 (0.7)          | 0.99       |                           |
| Partial deletions             |               | 0 (0.0)        | 8 (2.9)          | 0.99       |                           |
| Whole gene deletions          |               | 0 (0.0)        | 10 (3.6)         | 0.99       |                           |
| Splicing variants             |               | 2 (16.7)       | 34 (12.4)        | 0.66       |                           |
| Missense variants             |               | 1 (8.3)        | 62 (22.5)        | 0.47       |                           |
| Stop gain variants            |               | 4 (33.3)       | 81 (29.5)        | 0.75       |                           |

|                       |          |           |       |    |
|-----------------------|----------|-----------|-------|----|
| Frameshift variants   | 4 (33.3) | 66 (24.0) | 0.50  |    |
| Intragenic deletions  | 1 (8.3)  | 9 (3.3)   | 0.35  |    |
| c.574C>T; p.(R192*)   | 0 (0.0)  | 7 (2.5)   | 0.99  |    |
| c.6855C>A; p.(Y2285*) | 0 (0.0)  | 7 (2.5)   | 0.99  |    |
| c.3721C>T; p.(R1241*) | 1 (8.3)  | 4 (1.5)   | 0.19* | NS |
| c.6772C>T; p.(R2258*) | 1 (8.3)  | 3 (1.1)   | 0.16* | NS |
| c.910C>T; p.(R304*)   | 0 (0.0)  | 4 (1.5)   | 0.99  |    |
| c.2041C>T; p.(R681*)  | 0 (0.0)  | 3 (1.1)   | 0.99  |    |
| c.5488C>T; p.(R1830C) | 0 (0.0)  | 2 (0.7)   | 0.99  |    |

CALMs = café-au-lait macules. \* =  $p$ -value  $\leq 0.20$ , therefore included in the multivariate analysis together with \*\* =  $p$ -value  $\leq 0.05$ .

**Table S7.** Other neurological findings† correlations.

| Column Title                  | Column Title  | No<br>(N = 177) | Yes<br>(N = 110) | Univariate | Multivariate |
|-------------------------------|---------------|-----------------|------------------|------------|--------------|
| Age classes                   | 0–12 years    | 71 (40.1)       | 44 (40.0)        | 0.31       |              |
|                               | 13–18 years   | 94 (53.1)       | 63 (57.3)        |            |              |
|                               | 19–44 years   | 12 (6.8)        | 3 (2.7)          |            |              |
| Sex, males                    |               | 89 (50.3)       | 53 (48.2)        | 0.73       |              |
| Family history (first degree) |               | 53 (29.9)       | 35 (31.8)        | 0.74       |              |
| Status                        | De novo       | 25 (14.1)       | 23 (20.9)        | 0.18*      | NS           |
|                               | Maternal      | 15 (8.5)        | 14 (12.7)        |            |              |
|                               | Paternal      | 20 (11.3)       | 14 (12.7)        |            |              |
|                               | Not available | 117 (66.1)      | 59 (53.6)        |            |              |
| Duplication                   |               | 2 (1.1)         | 0 (0.0)          | 0.53       |              |
| Partial deletions             |               | 7 (4.0)         | 1 (0.9)          | 0.13*      | NS           |
| Whole gene deletions          |               | 7 (4.0)         | 3 (2.7)          | 0.58       |              |
| Splicing variants             |               | 23 (13.0)       | 13 (11.8)        | 0.77       |              |
| Missense variants             |               | 41 (23.2)       | 22 (20.0)        | 0.53       |              |
| Stop gain variants            |               | 52 (29.4)       | 33 (30.0)        | 0.91       |              |
| Frameshift variants           |               | 39 (22.0)       | 31 (28.2)        | 0.24       |              |
| Intragenic deletions          |               | 5 (2.8)         | 5 (4.5)          | 0.44       |              |
| c.574C>T; p.(R192*)           |               | 6 (3.4)         | 1 (0.9)          | 0.19*      | NS           |
| c.6855C>A; p.(Y2285*)         |               | 5 (2.8)         | 2 (1.8)          | 0.59       |              |
| c.3721C>T; p.(R1241*)         |               | 2 (1.1)         | 3 (2.7)          | 0.38       |              |
| c.6772C>T; p.(R2258*)         |               | 1 (0.6)         | 3 (2.7)          | 0.16*      | NS           |
| c.910C>T; p.(R304*)           |               | 2 (1.1)         | 2 (1.8)          | 0.64       |              |
| c.2041C>T; p.(R681*)          |               | 2 (1.1)         | 1 (0.9)          | 0.99       |              |
| c.5488C>T; p.(R1830C)         |               | 2 (1.1)         | 0 (0.0)          | 0.53       |              |

† Other neurological findings include: abnormal muscle tone, abnormal deep tendon reflexes, ataxia, tremor, fatigue, lower limbs pain, hallucinations, neurogenic bladder, hyperkinetic movements, paresthesias, and stereotyped movements. \* =  $p$ -value  $\leq 0.20$ , therefore included in the multivariate analysis together with \*\* =  $p$ -value  $\leq 0.05$ .
